# Supplementary material for: Drinking Water Turbidity and Emergency Department Visits for Gastrointestinal Illness in New York City, 2002-2009
Source: PubMed Central journal article supplement (PMC4412479; doi:10.1371/journal.pone.0125071), 2015-04-28
Supplement: pone.0125071.s001.pdf [file pone.0125071.s001.pdf]

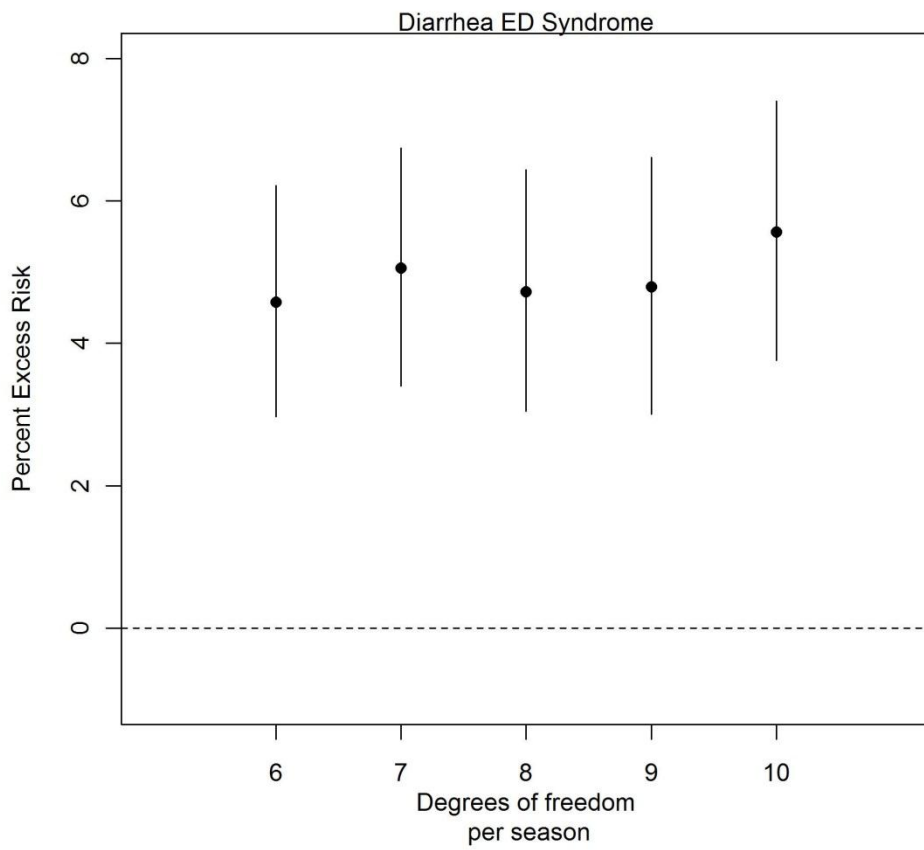

**S1 Fig. Sensitivity analysis- examination of risk estimates as a function of alternative degrees of freedom (df) for seasonal adjustment.**
