# Supplementary material for: Drinking Water Turbidity and Emergency Department Visits for Gastrointestinal Illness in New York City, 2002-2009
Source: PubMed Central journal article supplement (PMC4412479; doi:10.1371/journal.pone.0125071), 2015-04-28
Supplement: pone.0125071.s002.pdf [file pone.0125071.s002.pdf]

(i) Second-degree polynomial distributed lag model

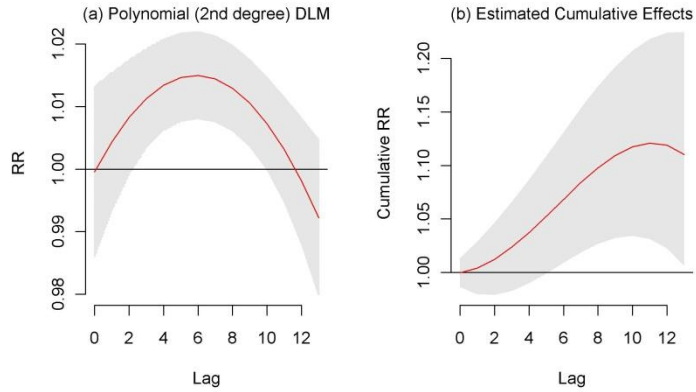

(ii) Third-degree polynomial distributed lag model

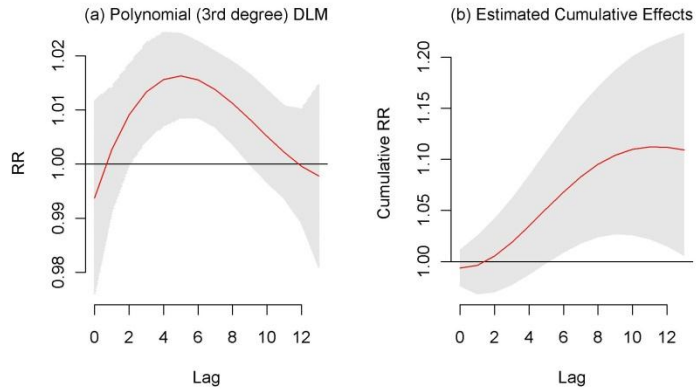

(iii) Fourth-degree polynomial distributed lag model

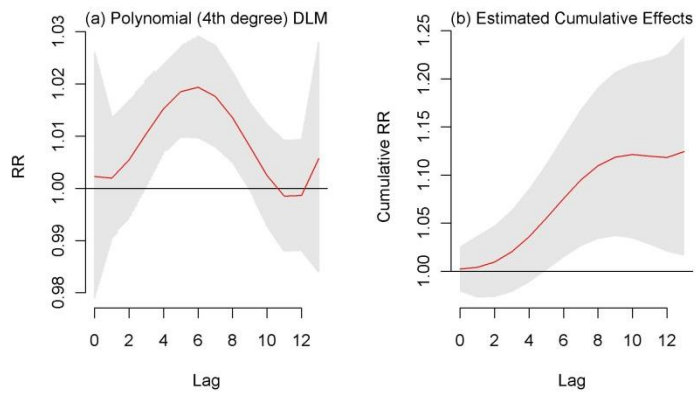

**S2 Fig. Fitted polynomial distributed lag models for lag 0 through 13 day turbidity and all-age diarrhea ED visits.**
