# Supplementary material for: Drinking Water Turbidity and Emergency Department Visits for Gastrointestinal Illness in New York City, 2002-2009
Source: PLoS One. 2015 Apr 28;10(4):e0125071. doi: 10.1371/journal.pone.0125071 (PMC4412479; doi:10.1371/journal.pone.0125071)
Supplement: S1 Table — (PDF) [file pone.0125071.s005.pdf]

**S1 Table: Summary statistics of daily turbidity data**

|                                                                                           | Years     | N sample sites | Mean (ntu) | Median (ntu) | Range (ntu) | N days system running | N days missing data | Percent of source water flow |
|-------------------------------------------------------------------------------------------|-----------|----------------|------------|--------------|-------------|-----------------------|---------------------|------------------------------|
| NYC distribution system turbidity (daily median of available samples from multiple sites) | 2002-2009 | 375            | 0.97       | 0.92         | 0.54-2.38   | 2922                  | 0                   | NA                           |
| Overall source water turbidity <sup>1</sup> (daily flow-weighted average)                 | 2002-2009 | 3              | 0.98       | 0.95         | 0.50-2.85   | 2922                  | 0                   | 100%                         |
| Catskill/Delaware turbidity <sup>1,2</sup> (daily average)                                | 2002-2009 | 2              | 0.98       | 0.95         | 0.50-2.85   | 2922                  | 26/47               | 96%                          |
| Croton turbidity                                                                          | 2002-2009 | 1              | 1.00       | 1.00         | 0.50-2.80   | 1166                  | 578                 | 4%                           |

1- Single outlier (4.6 ntu) excluded from analysis

2- Catskill and Delaware flow data available only as combined flow, contributions by volume from each system equal per NYC DEP
